# Supplementary material for: Antimicrobial susceptibility testing by using virulent phages to evaluate bacterial viability
Source: Royal Society of Chemistry journal article supplement (doi:10.1039/c8ay00150b), 2018-01-01
Supplement: c8ay00150b1.pdf [file c8ay00150b1.pdf]

Supporting Information for

## **Antimicrobial Susceptibility Testing by Using Virulent Phages to Evaluate Bacterial Viability**

Yong He<sup>a,b</sup>, Enci Fan<sup>a</sup>, Mengyao Wang<sup>a</sup>, Shuguang Lu<sup>c,\*</sup>, Zhifeng Fu<sup>a,\*\*</sup>

<sup>a</sup> Key Laboratory of Luminescence and Real-Time Analytical Chemistry (Ministry of Education), College of Pharmaceutical Sciences, Southwest University, Chongqing 400716, China

<sup>b</sup> Department of Pharmacy, Affiliated Hospital of Zunyi Medical College, Zunyi 563000, China

<sup>c</sup> Department of Microbiology, College of Basic Medical Science, Third Military Medical University, Chongqing 400038, China

## Table of Contents

Isolation of virulent phages

Amplification and purification of virulent phages

Measurement of lysis time of virulent phages

Figure S1

Table S1

Table S2

Table S3

SI Reference

### **Isolation of virulent phages**

Hospital sewage collected from Southwest Hospital of Third Military Medical University was used to isolate virulent phages according to a lambda phage isolation protocol with minor modification (Calendar 2006). Briefly, CaCl<sub>2</sub> was added into the hospital sewage with a final concentration of 1.0 M, followed by centrifugation at 10000 g for 10 min. Afterward, the collected supernatant was filtered through a 0.22- $\mu$ m filtration membrane. Subsequently, the host *P. aeruginosa* was mixed with the filtrate and cultured at 37 °C overnight. The host bacterial cells in the culture were removed by filtering through the same filtration membrane. Then 0.3 mL of *P. aeruginosa* culture and 0.3 mL of filtrate were mixed and incubated for 15 min at room temperature, followed by adding with 2.0 mL of semisolid LB broth. After mixing well, the semisolid LB broth was poured into solid LB broth plate, followed by incubation at 37 °C overnight. Isolation of the virulent phages was identified through the forming of single plaque.

### **Amplification and purification of virulent phages**

When the ratio of phages to host bacteria was above 10, the host bacteria can be completely captured and lysed by the phages (Kutter and Sulakvelidze 2005). Therefore, virulent phages titration above  $1.0 \times 10^7$  PFU mL<sup>-1</sup> was required in this protocol. The isolated single plaque of virulent phages was added into *P. aeruginosa* solution at early logarithmic phase. Then the *P. aeruginosa* solution was continuously cultured till it turned to transparent. To release the virulent phages from the cell debris, the lysate was added with NaCl (0.058 g mL<sup>-1</sup>), followed by centrifugation at 10000 g and 4 °C. Subsequently, 10% (w/v) PEG 8000 was added into the supernatant to precipitate virulent phages at 0 °C overnight. After centrifugal separation at 12000 g and 4 °C, the virulent phages solution was mixed with equal volume of chloroform, and centrifuged at 5000 g for 10 min. Finally, the virulent phages solution was stored in 0.05 M Tris-HCl buffer (pH 7.5) containing 0.2% MgSO<sub>4</sub>·7H<sub>2</sub>O at 4 °C. The purified phage was used to conduct the following detection of antimicrobial susceptibility testing (AST) of *P. aeruginosa*. Standard plaque assay procedure was

used to determine the titration of the obtained virulent phages. The titration of virulent phages remained stable for half year at 4 °C.

### **Measurement of lysis time of virulent phages**

One hundred microliters of *P. aeruginosa* solution was diluted with 0.9% NaCl solution to reach a final concentration of  $5.0 \times 10^5$  CFU mL<sup>-1</sup>, followed by adding with 50 µL of virulent phages solution at  $2.0 \times 10^9$  PFU mL<sup>-1</sup>. The mixture was cultured at 37 °C for various duration. For BL detection, 50 µL of the obtained lysate and the same volume of ATP BL detection reagent were mixed in the microplate in turn to trigger the BL signal at room temperature.

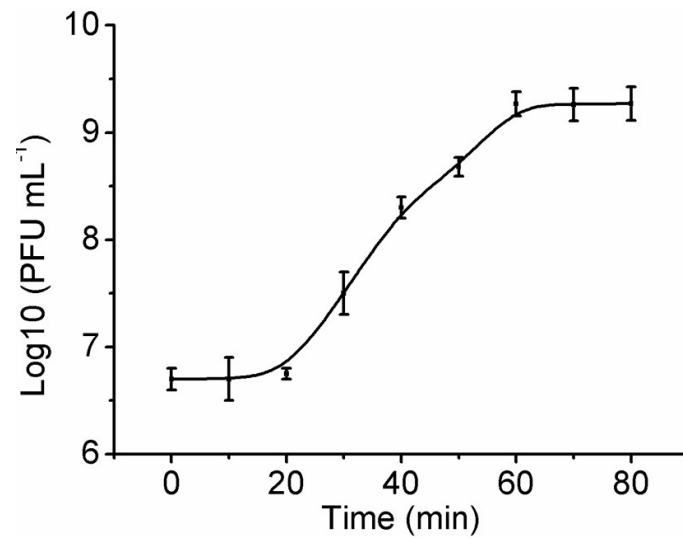

**Figure S1. Single-step growth curve of the isolated virulent phage.**

**Table S1. The principle of AST by using virulent phages to evaluating bacterial viability. S: susceptible, I: intermediate, R: resistant.**

| Group                          | Sample            | Lysis property of antibiotics | Susceptibility | BL signal | Origin      |
|--------------------------------|-------------------|-------------------------------|----------------|-----------|-------------|
| Control<br>(Solvent group, SG) | Bacteria          | Lytic antibiotics             | R              | -         | Antibiotics |
|                                |                   | Non-lytic antibiotics         | S              | +         |             |
|                                |                   |                               | R              | -         |             |
|                                |                   | S                             | -              |           |             |
| Testing<br>(Phage group, PG)   | Bacteria + phages | Lytic antibiotics             | R              | +         | Phages      |
|                                |                   | Non-lytic antibiotics         | S              | +         | Antibiotics |
|                                |                   |                               | R              | +         | Phages      |
|                                |                   | S                             | -              |           |             |

**Table S2. MIC interpretive standards for *P. aeruginosa*. S: susceptible, I: intermediate, R: resistant.**

| Report Group | Antibiotic | MIC Interpretive Criteria( $\mu\text{g mL}^{-1}$ ) |       |            |
|--------------|------------|----------------------------------------------------|-------|------------|
|              |            | S                                                  | I     | R          |
| A            | PIP        | $\leq 16$                                          | 32-64 | $\geq 128$ |
| A            | CAZ        | $\leq 8$                                           | 16    | $\geq 32$  |
| A            | GEN        | $\leq 4$                                           | 8     | $\geq 16$  |
| A            | TOB        | $\leq 4$                                           | 8     | $\geq 16$  |
| B            | LVX        | $\leq 2$                                           | 4     | $\geq 8$   |

**Table S3. MIC and MBC results of *P. aeruginosa* to different antibiotics performed by microbroth dilution method. S: susceptible, I: intermediate, R: resistant.**

| Antibiotic | MIC ( $\mu\text{g mL}^{-1}$ ) |                | MBC ( $\mu\text{g mL}^{-1}$ ) |
|------------|-------------------------------|----------------|-------------------------------|
|            | Value                         | Susceptibility |                               |
| PIP        | 256                           | R              | 512                           |
| CAZ        | 64                            | R              | 128                           |
| GEN        | 8                             | I              | 8                             |
| TOB        | <4                            | S              | <4                            |
| LVX        | 16                            | R              | 16                            |



## SI references

R. Calendar, *The Bacteriobacteriophages*, 2nd ed., Oxford University Press, UK, 2006.

E.Kutter, A. Sulakvelidze, *Bacteriophages: Biology and Applications*, 1st ed., CRC Press, Boca Raton, 2005.
